# Supplementary material for: Inkjet printing of silver nanowires on flexible surfaces and methodologies to improve the conductivity and stability of the printed patterns
Source: Royal Society of Chemistry journal article supplement (doi:10.1039/d0na00684j), 2020-11-05
Supplement: d0na00684j1.pdf [file d0na00684j1.pdf]

## Supporting Information

### **Title: Inkjet Printing of Silver nanowire on flexible surfaces and methodologies to improve conductivity and stability of the printed patterns**

#### **1. Details of the cartridge used for printing**

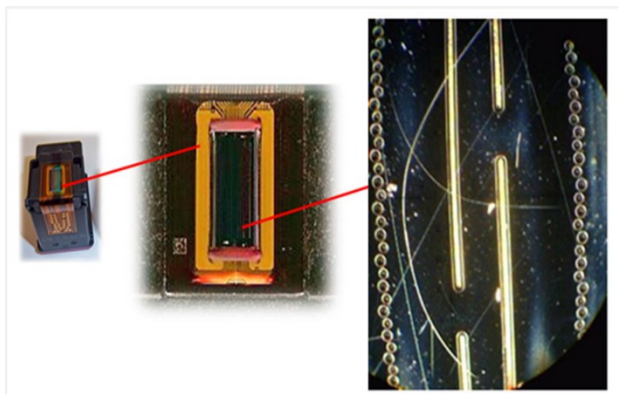

Figure 1 - A high resolution image of a cartridge nozzle plate (Ref : [https://inkjet411.com/?page\\_id=8990](https://inkjet411.com/?page_id=8990))

**Table 1. Parameters of cartridge**

|                                  |                        |
|----------------------------------|------------------------|
| Page yield (black and white)     | ~600 pages             |
| Print head nozzles               | 336                    |
| Printhead swath (inch)           | 1.42 cm (0.56)         |
| Nozzle diameter                  | ~10 $\mu\text{m}$      |
| Cartridge color                  | Black                  |
| Technology                       | Ink                    |
| Print cartridge volume delivered | 4 ml                   |
| Operating temperature range      | 15 to 32° C            |
| Non-Operating Humidity Range     | 20 to 80% RH           |
| Operating humidity range         | 20 to 80% RH           |
| Weight                           | 29.84 g                |
| Print technology                 | HP Thermal Inkjet      |
| Max Printing Speed               | 0.0983 m/s (98.3 mm/s) |

(Ref : <https://store.hp.com/in-en/default/hp-703-black-original-ink-advantage-cartridge-cd887aa.html>)

## 2. Spin coating

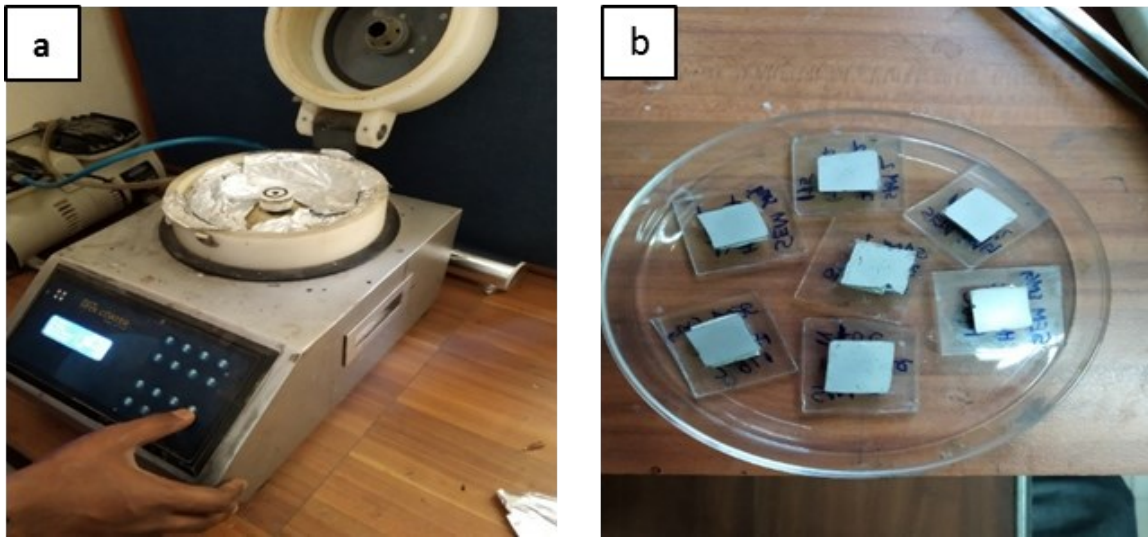

Figure 2: (a) Spin coating set up and (b) Spin coated silver nanowires ink formulation on glass slide.

## 3. Diameter of the Nanowire

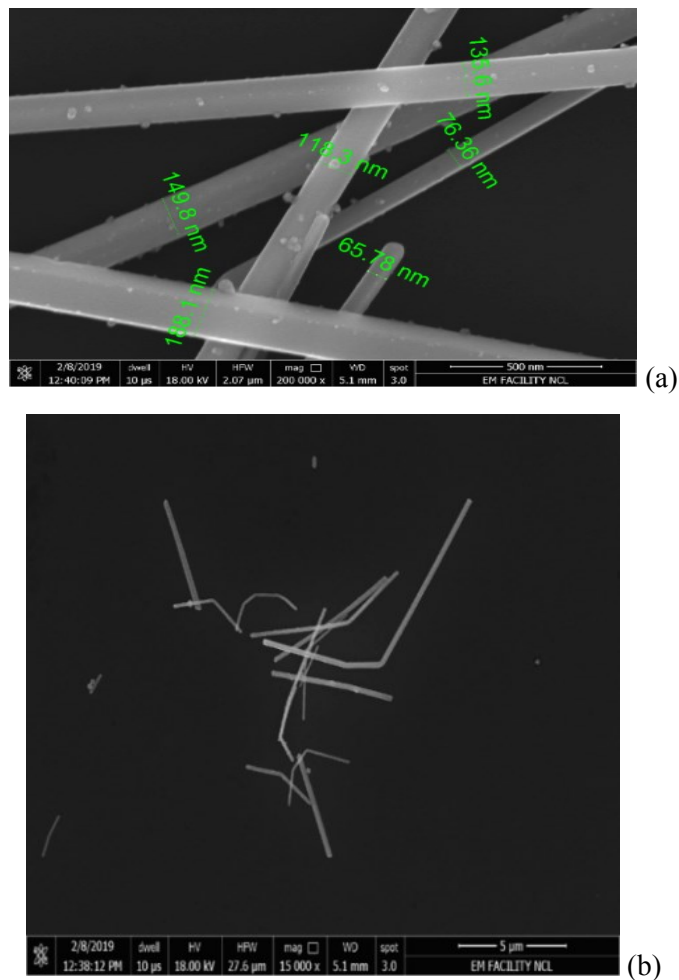

Figure 3: FE-SEM images of: (a) nanowires having average diameter of 121 nm and (b) nanowires after 6 hours of sonication
